# Supplementary material for: Coupled miR-155 Deficiency and Hypoxia Lead to the Upregulation of SLC2A3 (GLUT3) and VEGFA in the Leukemic B-cells
Source: Preprints.org preprint supplement (doi:10.20944/preprints202304.1197.v1), 2023-04-29
Supplement: Supplementary file 1 [file supplementary]

## Supplemental material

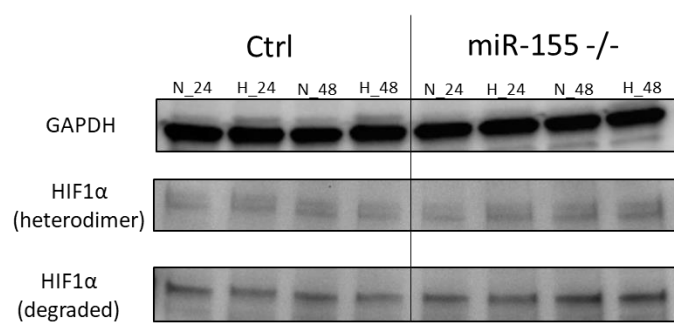

**Supplemental Figure 1:** Immunoblot. WB of HIF1α in MEC-1 cells after 24 and 48 hrs in 3 % O<sub>2</sub>. As reference gene, the protein level of GAPDH was used.
